# Supplementary material for: Health-risk Investigation Among First-grade School Children From Shanghai Chemical Industry Park (SCIP): A Cross-sectional Study
Source: Research Square preprint supplement (doi:10.21203/rs.3.rs-102621/v1), 2020-11-13
Supplement: Supplementary file 1 [file 243b0ad5d122f13ab614453f.docx]

**Appendix information:**

Table A1. Adjusted odds ratios (95% confidence intervals) for diseases and symptoms in first-grade school children in Jinshan District

| Diseases/  symptoms | Diseases | Total |  | Chemical industrial areas |  | |  |
| --- | --- | --- | --- | --- | --- | --- | --- |
|  |  | Proportion (%) |  | *aOR (95% CI)* | | *z-score* | *P value* |
| Diseases | Respiratory diseases | 22.88 |  | 0.73 (0.63,0.85) | | -4.01 | <0.001 |
|  | Digestive diseases | 4.16 |  | 0.83 (0.60,1.14) | | -1.12 | 0.262 |
|  | Skin diseases | 16.78 |  | 0.91 (0.77,1.08) | | -1.03 | 0.3 |
| Acute  symptoms | Respiratory symptoms | 64.80 |  | 1.01 (0.88,1.15) | | 0.08 | 0.933 |
|  | Eye symptoms | 4.89 |  | 0.92 (0.68,1.23) | | -0.59 | 0.557 |
|  | Neurological symptoms | 32.74 |  | 1.01 (0.88,1.16) | | 0.13 | 0.898 |
|  | Digestive symptoms | 8.03 |  | 0.79 (0.62,1.01) | | -1.85 | 0.064 |
|  | Skin symptoms | 9.45 |  | 0.86 (0.69,1.06) | | -1.41 | 0.159 |

Table A2. The information of complete blood count (CBC) parameters

| Parameters | Normal reference range |
| --- | --- |
| Red blood cell count (RBC) (1012/l) | 3.5-5.5 |
| Red cell distribution width (standard deviation) (fl) | 39-46 |
| White blood cell count (103/ml) | 4-10 |
| Hemoglobin (Hgb) (g/l) | 110-160 |
| Hematocrit (HCT) (%) | 37-49 |
| Platelet count (PLT) (109/l) | 100-300 |
| Platelet larger cell ratio (P-LCR) (%) | 13-43 |
| Platelet distribution width (PDW) (%) | 9-13 |
| Thrombocytocrit (%) | 0.13-0.43 |
| Mean platelet volume (MPV) (fl) | 9-13 |
| Mean corpuscular volume (fl) | 82-100 |
| Mean corpuscular hemoglobin (pg/cell) | 26-32 |
| Mean corpuscular hemoglobin concentration (g/l) | 310-370 |
| Red blood cell distribution width (%) | 9-16.50 |
| Percentage of neutrophils (%) | 45-75 |
| Percentage of lymphocytes (%) | 20-40 |
| Percentage of monocytes (% Mo) (%) | 3-12 |
| Percentage of eosinophils (%) | 0.50-5 |
| Percentage of basophils (% Ba) (%) | 0-1 |
| Absolute neutrophil counts (109/L) | 2-7 |
| Absolute lymphocyte counts (Abs Ly) (109/L) | 0.8-4 |
| Absolute monocyte counts (Abs Mo) (109/L) | 0.2-1.2 |
| Absolute eosinophil counts (109/L) | 0-0.5 |
